# Supplementary material for: Galectin-3 Is Associated with Cardiac Fibrosis and an Increased Risk of Sudden Death
Source: MDPI journal article supplement (doi:10.3390/cells12091218), 2023-04-23
Supplement: s1 [file s1]

## Supplemental Tables

**Supplemental Table S1. Socio-Demographic and baseline characteristics of the study subjects who died suddenly from cardiac or non-cardiac causes along with concomitant clinical variables and cardiac tissue morphometry**

| Categorical Variables |                          | Non-cardiac cause of death (n=54) | Cardiac cause of death (n=167) | Total (n=221) | P-value |
|-----------------------|--------------------------|-----------------------------------|--------------------------------|---------------|---------|
| Race                  | Caucasian                | 35 (27%)                          | 97 (73%)                       | 132           | 0.496   |
|                       | African American         | 16 (21%)                          | 59 (79%)                       | 75            |         |
|                       | Hispanic                 | 3 (38%)                           | 5 (63%)                        | 8             |         |
|                       | Other                    | 0 (0%)                            | 3 (100%)                       | 3             |         |
| ICD Present           |                          | 0 (0%)                            | 9 (100%)                       | 9             | 0.054   |
| Appropriate ICD shock |                          | 0 (0%)                            | 4 (100%)                       | 4             | 0.123   |
| DM                    |                          | 12 (14%)                          | 71 (86%)                       | 83            | 0.028*  |
| HTN                   |                          | 29 (19%)                          | 124 (81%)                      | 153           | 0.013*  |
| Tobacco               |                          | 21 (20%)                          | 84 (80%)                       | 105           | 0.244   |
| Public Arrest         |                          | 2 (11%)                           | 17 (89%)                       | 19            | 0.321   |
| Home Arrest           |                          | 13 (19%)                          | 54 (81%)                       | 67            | 0.498   |
| Hospital Arrest       |                          | 38 (29%)                          | 94 (71%)                       | 132           | 0.153   |
| Rhythm Prior to SCA   | Sinus rhythm             | 6 (50%)                           | 6 (50%)                        | 12            | 0.000*  |
|                       | Ventricular Tachycardia  | 0 (0%)                            | 15 (100%)                      | 15            |         |
|                       | Ventricular Fibrillation | 0 (0%)                            | 45 (100%)                      | 45            |         |
|                       | PEA                      | 20 (33%)                          | 41 (67%)                       | 61            |         |
|                       | Asystole                 | 7 (28%)                           | 18 (72%)                       | 25            |         |
| Atrial Fibrillation   |                          | 11 (22%)                          | 40 (78%)                       | 51            | 0.353   |
| Beta Blocker          |                          | 16 (18%)                          | 74 (82%)                       | 90            | 0.07    |
| ACEi/ARB              |                          | 19 (22%)                          | 66 (78%)                       | 85            | 0.629   |
| Statin                |                          | 11 (13%)                          | 74 (87%)                       | 85            | 0.002*  |
| Aspirin               |                          | 9 (11%)                           | 75 (89%)                       | 84            | 0.000*  |
| Diuretic              |                          | 14 (18%)                          | 65 (82%)                       | 79            | 0.112   |

Results are expressed as absolute numbers (percentage). \*, p-values of <0.05.

DM, diabetes mellitus; HTN, hypertension; ICD, implantable cardioverter defibrillator; SCA, sudden cardiac arrest; PEA, pulseless electrical activity; ACEi, angiotensin-converting enzyme inhibitor; ARB, angiotensin-receptor blocker.

**Supplemental Table S2. Risk factors, clinical data, and significant laboratory values of the study subjects who died suddenly from cardiac or non-cardiac causes**

| Continuous Variables         | Non cardiac cause of death<br>(n= 54) | Cardiac cause of death<br>(n=167) | Total<br>(n=221) | P-value |
|------------------------------|---------------------------------------|-----------------------------------|------------------|---------|
| QRS                          | 100 ±25.1                             | 109.2 ±33                         | 106.8 ±31.3      | 0.093   |
| QTc                          | 425.3 ±40.2                           | 419.3 ±60.2                       | 420.8 ±55.6      | 0.539   |
| Potassium                    | 4.6 ±0.9                              | 4.5 ±1.0                          | 4.5 ±1.0         | 0.316   |
| Magnesium                    | 2.2 ±0.6                              | 3.5 ±13.5                         | 3.1 ±11.4        | 0.541   |
| Sodium                       | 140.3 ±4.9                            | 137.4 ±15.7                       | 138.1 ±13.8      | 0.211   |
| Hemoglobin                   | 10 ±2.9                               | 10.6 ±2.6                         | 10.5 ±2.7        | 0.162   |
| Cholesterol                  | 178 ±29.2                             | 156.7 ±57.7                       | 160.3 ±54.3      | 0.262   |
| Triglycerides                | 120.8 ±80.3                           | 139.4 ±111.1                      | 136.1 ±105.8     | 0.602   |
| High Density Lipoprotein     | 46.5 ±19.6                            | 37.2 ±14                          | 38.8 ±15.4       | 0.081   |
| Low Density Lipoprotein      | 108.1 ±28.7                           | 97.2 ±43.6                        | 99 ±41.4         | 0.451   |
| Very Low Density Lipoprotein | 25.5 ±19.1                            | 27.8 ±22.4                        | 27.5 ±21.8       | 0.800   |
| Cholesterol/HDL              | 4.9 ±3.1                              | 4.9 ±2.8                          | 4.9 ±2.8         | 0.945   |
| LDL/HDL ratio                | 3.3 ±2.5                              | 3 ±2                              | 3.1 ±2.1         | 0.709   |
| BNP                          | 6445.1<br>±17385                      | 3264.1 ±8568.5                    | 3982.4 ±11142.4  | 0.252   |

Results in Supplemental 2 are expressed as mean ± SD, statistical significance was tested by student T-test or Chi-squared test, as appropriate.

HDL, High density lipoproteins; LDL, low density lipoprotein; BNP, brain-natriuretic peptide.
